# Supplementary material for: Saracatinib, a Src Tyrosine Kinase Inhibitor, as a Disease Modifier in the Rat DFP Model: Sex Differences, Neurobehavior, Gliosis, Neurodegeneration, and Nitro-Oxidative Stress
Source: MDPI journal article supplement (doi:10.3390/antiox11010061), 2021-12-28
Supplement: s1 [file s1]

Figure S1

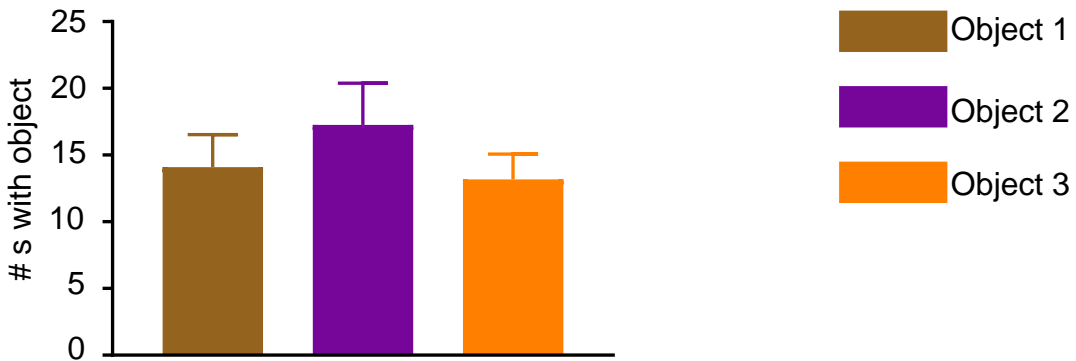

Figure S2

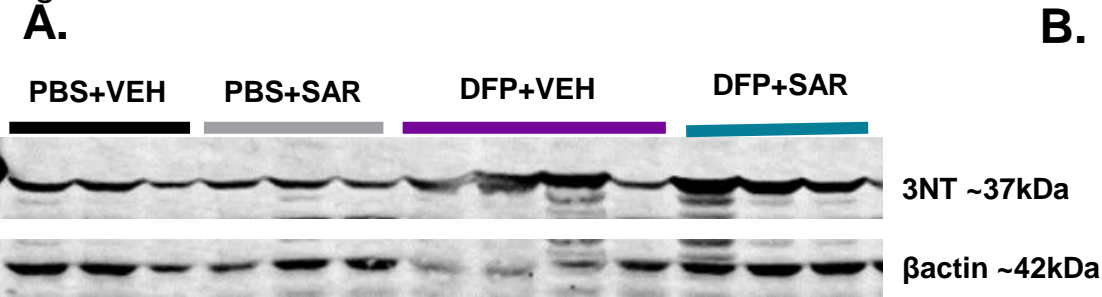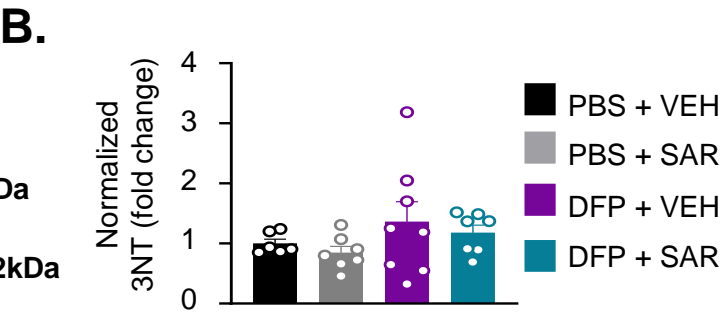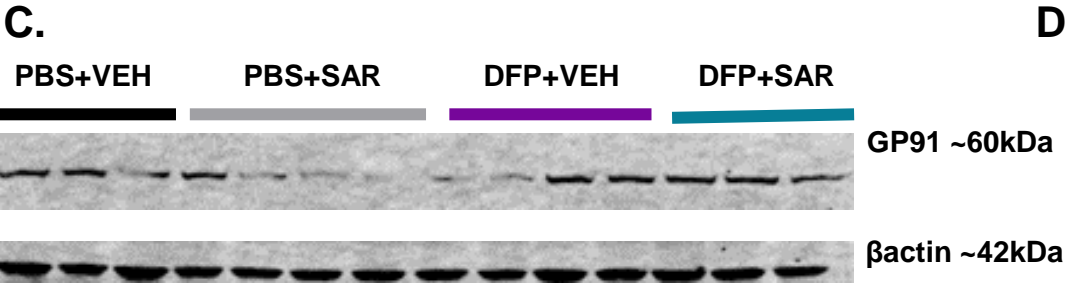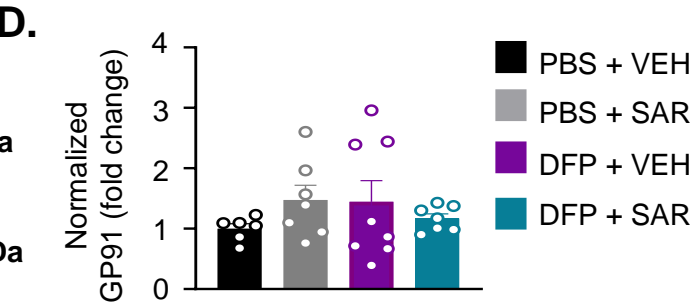

Table S1. Antibody suppliers and concentrations

| Antibody             | Species     | Supplier               | Concentration |         |
|----------------------|-------------|------------------------|---------------|---------|
|                      |             |                        | IHC           | WB      |
| IBA1                 | Anti-goat   | Abcam                  | 1:400         |         |
| GFAP                 | Anti-mouse  | Sigma Aldrich          | 1:400         |         |
| CD68                 | Anti-rabbit | Abcam                  | 1:300         |         |
| NeuN                 | Anti-rabbit | Millipore              | 1:400         |         |
| iNOS                 | Anti-rabbit | Abcam                  | 1:100         |         |
| 3-NT                 | Anti-mouse  | Abcam                  | 1:100         | 1:1000  |
| β-actin              | Anti-rabbit | Sigma Aldrich          |               | 1:10000 |
| β-actin              | Anti-mouse  | Sigma Aldrich          |               | 1:10000 |
| GP91 <sup>phox</sup> | Anti-mouse  | Santa Cruz             | 1:100         | 1:1000  |
| Biotinylated         | Anti-goat   | Jackson ImmunoResearch | 1:300         |         |
| Biotinylated         | Anti-rabbit | Jackson ImmunoResearch | 1:300         |         |
| Alexaflour           | Anti-mouse  | Jackson ImmunoResearch | 1:80          |         |
| Alexaflour           | Anti-rabbit | Jackson ImmunoResearch | 1:80          |         |
| Streptavidin CY3     |             | Jackson ImmunoResearch | 1:300         |         |
| IRDye 800CW          | Anti-rabbit | LI-COR Biosciences     |               | 1:10000 |
| IRDye 800CW          | Anti-mouse  | LI-COR Biosciences     |               | 1:10000 |
| IRDye 800CW          | Anti-goat   | LI-COR Biosciences     |               | 1:10000 |
| IRDye 680LT          | Anti-mouse  | LI-COR Biosciences     |               | 1:10000 |
| IRDye 680LT          | Anti-rabbit | LI-COR Biosciences     |               | 1:10000 |

Table S2. Summary of Regression for Glial cell markers and iNOS. \*Indicates p<0.05

| Glial cell marker | Oxidative stress marker | Region | Experimental Group | R <sup>2</sup> |
|-------------------|-------------------------|--------|--------------------|----------------|
| IBA1              | iNOS                    | PC     | PBS+VEH            | 0.073          |
| IBA1              | iNOS                    | PC     | PBS+SAR            | 0.163          |
| IBA1              | iNOS                    | PC     | DFP+VEH            | <b>0.577*</b>  |
| IBA1              | iNOS                    | PC     | DFP+SAR            | 0.007          |
| IBA1              | iNOS                    | AMY    | PBS+VEH            | 0.109          |
| IBA1              | iNOS                    | AMY    | PBS+SAR            | 0.479          |
| IBA1              | iNOS                    | AMY    | DFP+VEH            | <b>0.660*</b>  |
| IBA1              | iNOS                    | AMY    | DFP+SAR            | 0.028          |
| GFAP              | iNOS                    | PC     | PBS+VEH            | 0.033          |
| GFAP              | iNOS                    | PC     | PBS+SAR            | 0.33           |
| GFAP              | iNOS                    | PC     | DFP+VEH            | 0.225          |
| GFAP              | iNOS                    | PC     | DFP+SAR            | <b>0.737*</b>  |
| GFAP              | iNOS                    | AMY    | PBS+VEH            | 0.336          |
| GFAP              | iNOS                    | AMY    | PBS+SAR            | 0.45           |
| GFAP              | iNOS                    | AMY    | DFP+VEH            | 0.28           |
| GFAP              | iNOS                    | AMY    | DFP+SAR            | 0.117          |

Table S3. Summary of Regression for Glial cell markers and 3NT. \*Indicates p<0.05

| Glial cell marker | Oxidative stress marker | Region | Experimental Group | R <sup>2</sup> |
|-------------------|-------------------------|--------|--------------------|----------------|
| IBA1              | 3NT                     | PC     | PBS+VEH            | 0.037          |
| IBA1              | 3NT                     | PC     | PBS+SAR            | <b>0.856*</b>  |
| IBA1              | 3NT                     | PC     | DFP+VEH            | <b>0.784*</b>  |
| IBA1              | 3NT                     | PC     | DFP+SAR            | 0.000          |
| IBA1              | 3NT                     | AMY    | PBS+VEH            | 0.260          |
| IBA1              | 3NT                     | AMY    | PBS+SAR            | <b>0.825*</b>  |
| IBA1              | 3NT                     | AMY    | DFP+VEH            | <b>0.541*</b>  |
| IBA1              | 3NT                     | AMY    | DFP+SAR            | 0.024          |
| GFAP              | 3NT                     | PC     | PBS+VEH            | 0.587          |
| GFAP              | 3NT                     | PC     | PBS+SAR            | 0.018          |
| GFAP              | 3NT                     | PC     | DFP+VEH            | 0.194          |
| GFAP              | 3NT                     | PC     | DFP+SAR            | 0.010          |
| GFAP              | 3NT                     | AMY    | PBS+VEH            | 0.218          |
| GFAP              | 3NT                     | AMY    | PBS+SAR            | 0.163          |
| GFAP              | 3NT                     | AMY    | DFP+VEH            | 0.127          |
| GFAP              | 3NT                     | AMY    | DFP+SAR            | 0.064          |

Table S4. Summary of Regression for Glial cell markers and GP91<sup>phox</sup>. Indicates p<0.05

| Glial cell marker | Oxidative stress marker | Region | Experimental Group | R <sup>2</sup> |
|-------------------|-------------------------|--------|--------------------|----------------|
| IBA1              | GP91 <sup>phox</sup>    | PC     | PBS+VEH            | 0.441          |
| IBA1              | GP91 <sup>phox</sup>    | PC     | PBS+SAR            | 0.022          |
| IBA1              | GP91 <sup>phox</sup>    | PC     | DFP+VEH            | 0.029          |
| IBA1              | GP91 <sup>phox</sup>    | PC     | DFP+SAR            | 0.178          |
| IBA1              | GP91 <sup>phox</sup>    | AMY    | PBS+VEH            | 0.196          |
| IBA1              | GP91 <sup>phox</sup>    | AMY    | PBS+SAR            | 0.020          |
| IBA1              | GP91 <sup>phox</sup>    | AMY    | DFP+VEH            | 0.002          |
| IBA1              | GP91 <sup>phox</sup>    | AMY    | DFP+SAR            | <b>0.545*</b>  |
| GFAP              | GP91 <sup>phox</sup>    | PC     | PBS+VEH            | 0.009          |
| GFAP              | GP91 <sup>phox</sup>    | PC     | PBS+SAR            | 0.020          |
| GFAP              | GP91 <sup>phox</sup>    | PC     | DFP+VEH            | 0.192          |
| GFAP              | GP91 <sup>phox</sup>    | PC     | DFP+SAR            | 0.010          |
| GFAP              | GP91 <sup>phox</sup>    | AMY    | PBS+VEH            | 0.007          |
| GFAP              | GP91 <sup>phox</sup>    | AMY    | PBS+SAR            | 0.132          |
| GFAP              | GP91 <sup>phox</sup>    | AMY    | DFP+VEH            | 0.058          |
| GFAP              | GP91 <sup>phox</sup>    | AMY    | DFP+SAR            | 0.352          |
