# Supplementary figures and images for: Saracatinib, a Src Tyrosine Kinase Inhibitor, as a Disease Modifier in the Rat DFP Model: Sex Differences, Neurobehavior, Gliosis, Neurodegeneration, and Nitro-Oxidative Stress
Source: MDPI journal article supplement (doi:10.3390/antiox11010061), 2021-12-28

Figure S3

3NT original blot

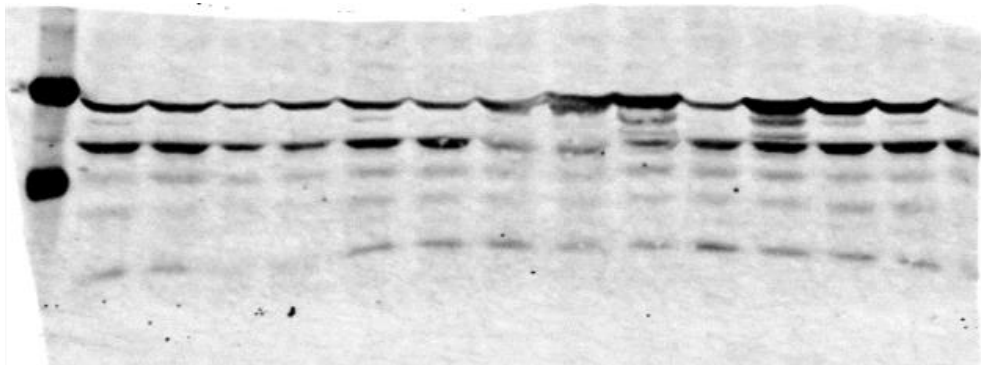

GP91 original blot

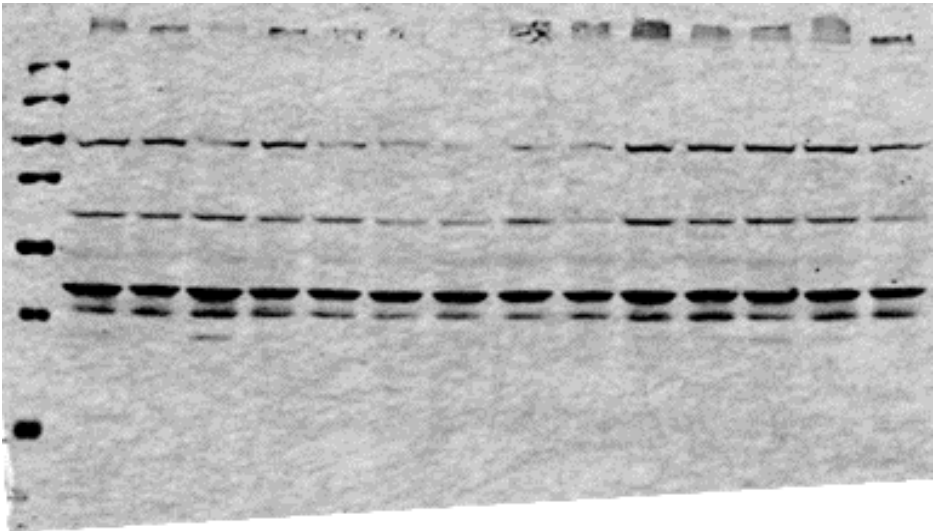

Supplement: s1 [file s1]
